# Supplementary material
Source: Springer Nature journal article supplement (https://www.springermedizin.de/resource/supplementary/12882_2013_725_MOESM17_ESM.pdf/9454558)

**A**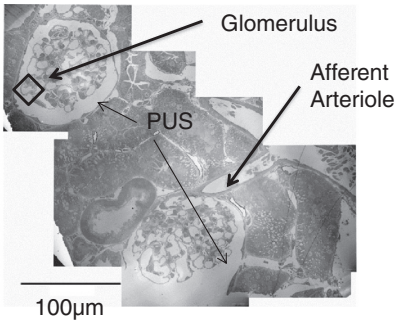**B**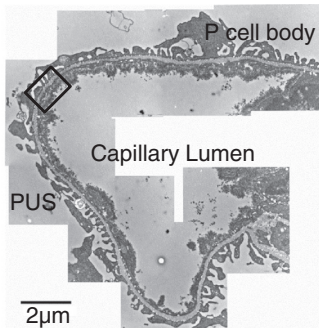**C**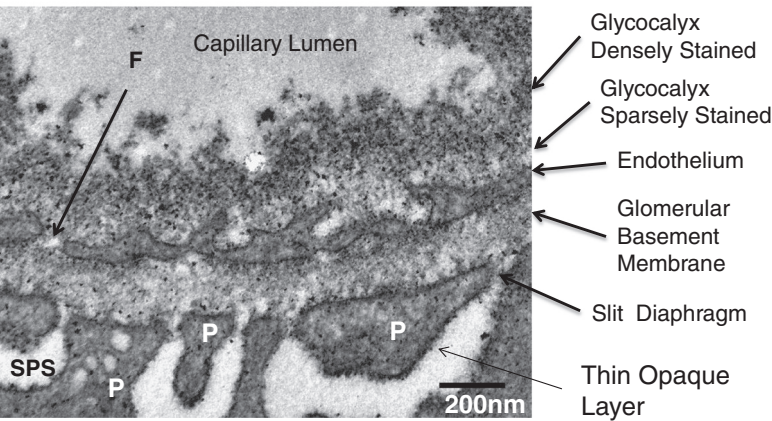

Supplement: MOESM17 [file 9454558]
